# Pro-Active Call Center Treatment Support (PACCTS) to Improve Glucose Control in Type 2 Diabetes

A randomized controlled trial

ROBERT J. YOUNG, MD<sup>1</sup>  
JEAN TAYLOR, RN<sup>1</sup>  
TIM FRIEDE, PHD<sup>2</sup>  
SALLY HOLLIS, PHD<sup>2</sup>  
JAMES M. MASON, PHD<sup>3</sup>  
PAULINE LEE, RN<sup>1</sup>

EDNA BURNS<sup>1</sup>  
ANDREW F. LONG, PHD<sup>4</sup>  
TINA GAMBLING, PHD<sup>5</sup>  
JOHN P. NEW, MB<sup>1</sup>  
J. MARTIN GIBSON, MD<sup>1</sup>

**OBJECTIVE** — To determine whether Pro-Active Call Center Treatment Support (PACCTS), using trained nonmedical telephonists supported by specially designed software and a diabetes nurse, can effectively improve glycemic control in type 2 diabetes.

**RESEARCH DESIGN AND METHODS** — A randomized controlled implementation trial of 1-year duration was conducted in Salford, U.K. The trial comprised 591 randomly selected individuals with type 2 diabetes. By random allocation, 197 individuals were assigned to the usual care (control) group and 394 to the PACCTS (intervention) group. Lifestyle advice and drug treatment in both groups followed local guidelines. PACCTS patients were telephoned according to a protocol with the frequency of calls proportional to the last HbA<sub>1c</sub> level. The primary outcome was absolute reduction in HbA<sub>1c</sub>, and the secondary outcome was the proportion of patients reducing HbA<sub>1c</sub> by at least 1%.

**RESULTS** — A total of 332 patients (84%) in the PACCTS group and 176 patients (89%) in the control group completed the study. Final HbA<sub>1c</sub> values were available in 374 patients (95%) in the PACCTS group and 180 patients (92%) in the usual care group. Compared with usual care, HbA<sub>1c</sub> improved by 0.31% (95% CI 0.11–0.52,  $P = 0.003$ ) overall in the PACCTS patients. For patients with baseline HbA<sub>1c</sub> >7%, the improvement increased to 0.49% (0.21–0.77,  $P < 0.001$ ), whereas in patients with baseline HbA<sub>1c</sub> <7% there was no change. The difference in the proportions of patients achieving a  $\geq 1\%$  reduction in HbA<sub>1c</sub> significantly favored the PACCTS intervention: 10% (4–16,  $P < 0.001$ ) overall and 15% (7–24,  $P < 0.001$ ) for patients with baseline HbA<sub>1c</sub> >7%.

**CONCLUSIONS** — In an urban Caucasian trial population with blood glucose HbA<sub>1c</sub> >7%, PACCTS facilitated significant improvement in glycemic control. Further research should extend the validity of findings to rural communities and other ethnic groups, as well as to smoking and lipid and blood pressure control.

*Diabetes Care* 28:278–282, 2005

From the <sup>1</sup>Department of Diabetes & Endocrinology, Hope Hospital, Salford, U.K.; the <sup>2</sup>Medical Statistics Unit, Department of Mathematics and Statistics, Lancaster University, Lancaster, U.K.; the <sup>3</sup>Wolfson Research Unit, School for Health, University of Durham, Stockton-on-Tees, U.K.; the <sup>4</sup>Health Care Practice R&D Unit, University of Salford, Salford, U.K.; and the <sup>5</sup>School of Health Care Studies, University of Wales College of Medicine, Cardiff, U.K.

Address correspondence and reprint requests to Robert J. Young, Diabetes & Endocrinology, Hope Hospital, Salford M6 8HD, U.K. E-mail: bob.young@srht.nhs.uk.

Received for publication 9 July 2004 and accepted in revised form 15 October 2004.

J.M.M. has received research funds from Hope Hospital, Salford, as a subcontractor providing support to the PACCTS study. The original source of funds was an unrestricted grant from GlaxoSmithKline.

**Abbreviations:** OHA, oral hypoglycemic agent; PACCTS, Pro-Active Call Center Treatment Support.

A table elsewhere in this issue shows conventional and Système International (SI) units and conversion factors for many substances.

© 2005 by the American Diabetes Association.

The costs of publication of this article were defrayed in part by the payment of page charges. This article must therefore be hereby marked "advertisement" in accordance with 18 U.S.C. Section 1734 solely to indicate this fact.

A worldwide epidemic of type 2 diabetes is threatening to overwhelm the capacity of health care service providers. There is good evidence that tight blood glucose, blood pressure, and lipid control can markedly reduce the adverse impact of type 2 diabetes and deliver substantial health benefits (1–4). Reviews of implementation strategies to achieve these treatment targets indicate that a multifaceted approach is most successful (5). Although a stepped-care program based on guidelines, education of primary care professionals, and support from secondary and intermediate care specialists has achieved appreciable improvements in blood pressure and lipid control in the Salford area, it has failed, thus far, to improve blood glucose control (6).

Chronic disease management programs seem to be most successful when they support treatment adherence and self-efficacy (7–10). Attaining type 2 diabetes treatment targets requires appreciable pharmacologic intervention (1,3,4). However, good blood glucose control may be particularly difficult because of the stringent complementary lifestyle demands and the progressive increase in the need for hypoglycemic therapy. Diabetes educator-led, Pro-Active Call Center Treatment Support (PACCTS) for diabetes care is well established as a health care delivery vehicle in the U.S. It seems to offer service delivery characteristics that might enhance effectiveness, such as continuity, convenience, and risk-stratified intervention. However, it has not been subject to rigorous or large-scale clinical trial assessment of its effectiveness or efficiency (11).

Therefore, we decided to examine the clinical effectiveness, acceptability, and cost-effectiveness of PACCTS in a publicly funded primary health care setting. The aim was to provide a convenient, risk-stratified intervention to improve glucose control by promoting lifestyle

Table 1—Patient baseline characteristics

|                              | Missing (test/control) | PACCTS           | Usual care       |
|------------------------------|------------------------|------------------|------------------|
| n                            |                        | 394              | 197              |
| Age (years)                  | 0/0                    | 67 (29–91)       | 67 (22–88)       |
| Sex (male)                   | 0/0                    | 227 (58)         | 114 (58)         |
| BMI (kg/m <sup>2</sup> )     | 94/48                  | 30.2 (18.3–57.5) | 30.3 (22.4–57.7) |
| Duration of diabetes (years) | 13/3                   | 6 (1–39)         | 6 (1–35)         |
| Carstairs Deprivation 4 & 5* | 0/0                    | 335 (85)         | 167 (85)         |
| Baseline treatment           |                        |                  |                  |
| Lifestyle                    | 0/0                    | 95 (24)          | 45 (23)          |
| One OHA†                     | 0/0                    | 115 (29)         | 58 (30)          |
| Two OHAs                     | 0/0                    | 92 (23)          | 58 (30)          |
| Insulin with or without OHA  | 0/0                    | 92 (23)          | 35 (18)          |
| HbA <sub>1c</sub> (%)        | 0/0                    | 7.9 (5.2–15.1)   | 8.0 (4.8–14.9)   |

Data are means (range) or n (%). \*Carstairs V: Deprivation indices: their interpretation and use in relation to health. *J Epidemiol Community Health* 49 (Suppl 2):S3–S8, 1995. †OHAs: metformin, sulphonylurea, or thiazolidinedione.

management, treatment adherence, and self-efficacy. The study was a randomized control trial within an unselected sample of the Salford population of individuals with type 2 diabetes. Considering the shortage of trained personnel in the U.K., we modified the U.S approach by designing the program to be delivered predominantly by previously untrained “telecarers” backed up by a diabetes specialist nurse when treatment changes or problem solving were necessary. A comprehensive qualitative study, assessing the acceptability of the PACCTS intervention, and an economic analysis of trial findings were conducted and will be reported separately.

## RESEARCH DESIGN AND METHODS

The usual care (control) group continued with conventional treatment based on local guidelines, which had been in place for >10 years, supported by a continuing education program among all primary care practices. The guidelines advocate a standard stepped-care protocol for management of type 2 diabetes, including a comprehensive annual review. In addition to usual care, the PACCTS group received call center support (see below).

The target mean difference between the intervention and control groups was specified as 1% HbA<sub>1c</sub>. The within-group HbA<sub>1c</sub> SD was estimated as 2% from the Salford District Diabetes Information System. For a significance level of 5% (two sided) and a desired power of 90%, a total sample size of 190 was required. A secondary end point was specified as the pro-

portion of patients with a reduction in HbA<sub>1c</sub> of >1%. Assuming proportions of 10 and 20% in the control and intervention groups, respectively, implies a total sample size of 608 (significance level 5%, power 90%). To power the study for both targets and for reasons of clinical validity (the PACCTS group would be large enough to simulate a real treatment delivery program), it was agreed to randomize intervention to control in a ratio of 2:1. The target, therefore, was to recruit 600 randomly selected individuals with type 2 diabetes from participating practices. Recruitment was carried out by the call center staff (diabetes specialist nurse and telecarers) between October 2001 and February 2002. In all recruits, baseline HbA<sub>1c</sub> was measured when consent for participation was given. Postrecruitment block randomization, stratified by baseline HbA<sub>1c</sub> (<7, 7–9 or >9%), was performed by the statisticians (S.H. and T.F.) using SAS software (block length 9, 6 intervention to 3 control; SAS Institute, Cary, NC). Those allocated to the intervention group received their first call between April and June 2002 and their final call during April and June 2003. Both usual care and PACCTS patients provided final HbA<sub>1c</sub> values during April through June 2003.

## Recruitment

Salford is an inner-city location within Greater Manchester, U.K. The population is 95% white European. More than 80% of the population is in the lowest two socioeconomic categories. All 67 Salford general practices were invited to partici-

pate; among 23 group practices, 22 agreed and 1 declined. Of the 44 single-handed practices, 25 participated, 2 declined, and 15 did not respond. Patients were excluded because of diagnosis of diabetes <1 year previously, inability to use the phone, or terminal illness. In consequence, 2,894 patients (80% of the total registered population of people with type 2 diabetes) were available for recruitment. Random selections of these people were informed about the study by letter; from 1,970 letters, there were 1,047 responses, 689 of which indicated agreement to attend a formal group recruitment session. A total of 599 respondents actually attended, 596 of whom agreed to take part in the study. Because five respondents died before receiving the first call, 591 individuals actually entered the study. Patients enrolled were representative of the diagnosed diabetes population in Salford with respect to age, sex, duration of diagnosed diabetes, socioeconomic status, and type of treatment. By random allocation, 197 patients were assigned to the usual care group and 394 patients were assigned to the PACCTS group. The baseline characteristics were similar for the two groups and are shown in Table 1. A total of 7.6% of control subjects and 7.5% of the PACCTS patients were lost due to death, serious illness, or moving away. An additional 8.2% of intervention patients left the study because they could not cope with the calls (2.3%), were unhappy with the advice (1%), changed their mind (0.8%), were traveling (0.8%), were too busy (0.8%), were bereaved (0.8%), or had other reasons (0.8%).

## Call center technology

A research call center incorporating Cisco Systems intranet protocol equipment (Cisco Systems, San Jose, CA) was established within the local research facility. A type 2 diabetes script application based on J2EE (Java; Sun Microsystems, Santa Clara, CA) was written in partnership between the Diabetes Project Team and British Telecom. The application supported patient education (lifestyle and medication adherence), metabolic management, and referrals between telecarers and the diabetes specialist nurse. The personnel comprised two part-time telecarers (1.4 whole time equivalents) and one diabetes specialist nurse (0.4 whole time equivalent nursing, 0.6 whole time equivalent project management). The staff had ac-



Table 2—Mean difference in HbA<sub>1c</sub>

| Baseline HbA <sub>1c</sub> (%) | Percent of patients |        | HbA <sub>1c</sub> change from baseline |            |            |                  |        |
|--------------------------------|---------------------|--------|----------------------------------------|------------|------------|------------------|--------|
|                                | Usual care          | PACCTS | Usual care                             | PACCTS     | Difference | 95% CI           | P      |
| <7                             | 29.4                | 29.9   | 0.2 ± 0.6                              | 0.2 ± 0.8  | 0.04       | (−0.17 to 0.25)  | 0.74   |
| 7–9                            | 51.7                | 52.2   | 0.0 ± 1.3                              | −0.5 ± 0.9 | −0.49      | (−0.21 to −0.77) | <0.001 |
| >9                             | 18.8                | 17.8   | 1.5 ± 2.0                              | −1.9 ± 1.6 | −0.37      | (−1.13 to 0.11)  | 0.33   |
| All                            |                     |        |                                        |            | −0.31      | (−0.11 to 0.52)  | 0.003  |

Data are means ± SD unless otherwise indicated.

only); lifestyle and one oral hypoglycemic agent (OHA); lifestyle and two or more OHAs; lifestyle and insulin with or without oral hypoglycemic drugs.

**RESULTS** — During the 12 months of the trial, there were >4,000 telephone consultations (90% outbound, 10% inbound). Withdrawal from the study occurred in 10.7% of usual care subjects and 15.7% of PACCTS patients. Approximately one-third of the intervention group dropouts were linked to the PACCTS intervention (see above). Patients withdrawing from the study were not different in age, sex, or socioeconomic status from those who continued.

Overall, medication increased in the control group. There was no change in 91% and a step up in 9% of patients (six patients increased medication by one OHA, one increased by two OHAs, and eight started insulin therapy;  $P < 0.001$ ). In the PACCTS group, medication decreased in 3%, did not change in 75%, and stepped up in 22% of patients (11 patients stopped or reduced OHAs, 57 increased by one OHA, six increased by two OHAs, and 24 started insulin therapy;  $P < 0.001$ ). Medication increased more in the PACCTS group than the usual care group ( $P = 0.002$ ).

Mean differences in HbA<sub>1c</sub> were analyzed on an intention-to-treat basis overall and by baseline HbA<sub>1c</sub> strata (Table 2). Overall, HbA<sub>1c</sub> improved by 0.3% in the PACCTS group when compared with the usual care group ( $P < 0.003$ ). For patients with baseline HbA<sub>1c</sub>  $\geq 7\%$  (moderate or poor control at baseline), the improvement increased to 0.49% ( $P < 0.001$ ), whereas in patients with baseline HbA<sub>1c</sub>  $< 7\%$ , there was no change. Defining response as an absolute improvement in HbA<sub>1c</sub> of 1% (Table 3), significantly more patients responded overall (10%,

$P < 0.001$ ) and more patients with baseline HbA<sub>1c</sub>  $> 7\%$  (15%,  $P < 0.001$ ).

Further investigation of these results showed that there was no age, sex, or practice (group versus single-handed) effect. Results of the acceptability and cost-effectiveness studies are the subjects of companion articles.

**CONCLUSIONS** — In this randomized controlled trial, PACCTS for patients with type 2 diabetes did not achieve the prespecified target mean HbA<sub>1c</sub> reduction of 1%. However, over 1 year, it did achieve an average reduction of 0.49% HbA<sub>1c</sub> in patients who were moderately or poorly controlled at baseline (HbA<sub>1c</sub>  $> 7\%$ ), a clinically worthwhile effect. The effect of PACCTS was achieved with only a modest influence on net prescribing, and companion articles show that the PACCTS approach was very popular with patients and borderline cost-effective (12). The three reports together build on previous research, provide an information-rich health technology assessment, and explore long-term implications, consistent with Medical Research Council guidance on evaluating complex interventions (13).

The largest, longest, and most influential study of glucose control in type 2 diabetes, U.K. Prospective Diabetes Study (UKPDS) (1) illustrated the effort re-

quired to obtain and maintain improved glucose control. Our study suggest that, with PACCTS, it is possible to obtain an improvement about half as large as that achieved in UKPDS among people whose glucose control is above target. Furthermore, because there was little difference in prescribed medication, this improvement seems to be substantially due to lifestyle changes and treatment adherence. There is emerging evidence that telephone-based diabetes education may be effective (14–18). In previous studies, the telephone education has usually been delivered by nurses and dietitians, whereas PACCTS used trained call operatives (telecarers) supported by a specifically designed call center application, with a specialist nurse being deployed only for training, supervision, and alteration of medication. In one study in which automated calls were combined with nurse follow-up self-efficacy, depression and satisfaction were improved (19).

The demand for chronic disease management support is burgeoning, and demographic forces imply that this trend will continue into the foreseeable future. The demand for ongoing, convenient education and supported self-efficacy, the cornerstones of effective chronic disease management, is likely to be met only by novel systems of health care delivery that can be shown to be effective, affordable,

Table 3—Proportion of patients achieving at least 1% absolute reduction in HbA<sub>1c</sub>

| Baseline HbA <sub>1c</sub> (%) | n   | Percent with $\geq 1\%$ reduction in HbA <sub>1c</sub> |        |            |           |        |
|--------------------------------|-----|--------------------------------------------------------|--------|------------|-----------|--------|
|                                |     | Usual care                                             | PACCTS | Difference | (95% CI)  | P      |
| <7                             | 176 | 2                                                      | 1      | −1         | (−5 to 3) | 0.61   |
| 7–9                            | 308 | 16                                                     | 29     | 13         | (4–22)    | 0.01   |
| >9                             | 107 | 51                                                     | 73     | 22         | (2–41)    | 0.03   |
| All                            | 591 |                                                        |        | 10         | (4–16)    | <0.001 |



and acceptable. The evidence from this study suggests that, among the population studied, PACCTS lead by trained telecarers and supported by diabetes nurses may be such a system. However, further evidence will be needed from studies in populations with different characteristics (e.g., rural communities and ethnic minorities) over a longer period of time and encompassing other aspects of diabetes care (e.g., smoking, lipids, and blood pressure) to determine whether PACCTS provides a transferable, sustainable, and cost-effective intervention.

**Acknowledgments**—The staff, data management, and analysis costs of this study were funded by an unrestricted grant from Glaxo-SmithKline. British Telecom acted as technology partners funding call center equipment and development and maintenance costs.

The randomized controlled trial was conceived by R.J.Y. and J.P.N. R.J.Y. coordinated the research. All authors contributed to developing the protocol, interpreting findings, and writing the article. T.F. and S.H. analyzed the data. R.J.Y. will act as guarantor.

## References

1. UK Prospective Diabetes Study Group (UKPDS 33): Intensive blood glucose control with sulphonylureas or insulin compared with conventional treatment and risk of complications in patients with type 2 diabetes. *Lancet* 352:837–853, 1998
2. UK Prospective Diabetes Study Group: Cost-effectiveness analysis of improved blood pressure control in hypertensive patients with type 2 diabetes: UKPDS 40. *BMJ* 317:720–763, 1998
3. UK Prospective Diabetes Study Group: Efficacy of atenolol and captopril in reducing risk of macrovascular and microvascular complications in type 2 diabetes: UKPDS 39. *BMJ* 317:713–720, 1998
4. UK Prospective Diabetes Study Group: Tight blood pressure control and risk of macrovascular and microvascular complications in type 2 diabetes: UKPDS 38. *BMJ* 317:703–713, 1998
5. Renders CM, Valk GD, Griffin SJ, Wagner EH, Van JTE, Assendelft WJJ: Interventions to improve the management of diabetes in primary care, outpatient, and community settings: a systematic review. *Diabetes Care* 24:1821–1833, 2001
6. Edwards R, Burns JA, McElduff P, Young RJ, New JP: Variations in process and outcomes of diabetes care by socio-economic status in Salford, UK. *Diabetologia* 46: 750–759, 2003
7. Norris SL, Lau J, Smith SJ, Schmid CH, Engelgau MM: Self-management education for adults with type 2 diabetes: a meta-analysis of the effect on glycemic control. *Diabetes Care* 25:1159–1171, 2002
8. Bodenheimer T, Lorig K, Holman H, Grumbach K: Patient self-management of chronic disease in primary care. *JAMA* 288:2469–2475, 2002
9. Haynes RB, McDonald H, Garg AX, Montague P: Helping patients follow prescribed treatment: clinical applications. *JAMA* 288:2880–2883, 2002
10. McDonald HP, Garg AX, Haynes RB: Interventions to enhance patient adherence to medication prescriptions: scientific review. *JAMA* 288:2868–2879, 2002
11. Klonoff DC: Diabetes and telemedicine: is the technology sound, effective, cost-effective, and practical? (Editorial). *Diabetes Care* 26:1626–1628, 2003
12. Long AF, Gambling T, Young RJ, Taylor J, Mason JM, the PACCTS Team: Acceptability and satisfaction with a telecarer approach to the management of type 2 diabetes. *Diabetes Care* 28:283–289, 2004
13. Campbell M, Fitzpatrick R, Haines A, Kinmonth AL, Sandercock P, Spiegelhalter D, Tyrer P: Framework for design and evaluation of complex interventions to improve health. *BMJ* 321:694–696, 2000
14. Biermann E, Dietrich W, Rihl J, Standl E: Are there time and cost savings by using telemanagement for patients on intensified insulin therapy? A randomised, controlled trial. *Comput Methods Prog Biomed* 69:137–146, 2002
15. Gomez EJ, Hernando ME, Garcia A, Del Pozo F, Cermenio J, Corcoy R, Bragues E, De Leiva A: Telemedicine as a tool for intensive management of diabetes: the DIABTel experience. *Comput Methods Prog Biomed* 69:163–177, 2002
16. Hersh WR, Helfand M, Wallace J, Kraemer D, Patterson P, Shapiro S, Greenlick M: Clinical outcomes resulting from telemedicine interventions: a systematic review. *BMC Med Inform Decision Making* 1:5, 2001
17. Howells L, Wilson AC, Skinner TC, Newton R, Morris A, Greene SA: A randomised control trial of the effect of negotiated telephone support on glycaemic control in young people with type 1 diabetes. *Diabet Med* 19:643–648, 2002
18. Izquierdo RE, Knudson PE, Meyer S, Kearns J, Ploutz-Snyder R, Weinstock RS: A comparison of diabetes education administered through telemedicine versus in person. *Diabetes Care* 26:1002–1007, 2003
19. Piette JD, Weinberger M, McPhee SJ: The effect of automated calls with telephone nurse follow-up on patient-centered outcomes of diabetes care: a randomized, controlled trial. *Med Care* 38:218–230, 2000
